# Supplementary material for: Moderate-High Blood Eosinophilia Is Associated with Increased Hospitalization and Other Asthma Comorbidities
Source: MDPI journal article supplement (doi:10.3390/biom14010126), 2024-01-18
Supplement: s1 [file s1]

## Supplementary material

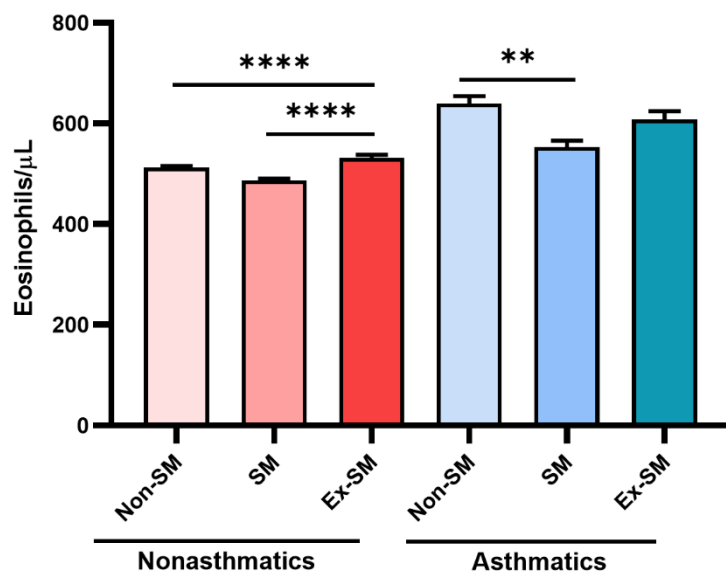

**Figure S1.** Smokers have significantly lower mean BEC in both nonasthmatic and asthmatic subjects. BEC in asthmatic and nonasthmatic subjects according to their smoking habit. \*\*\*\*= $P < 0.0001$ ; \*\*= $P < 0.005$ . BEC, Blood Eosinophil Count; Non-SM, Non-smoker; SM, Smoker; Ex-SM, Ex-Smoker.

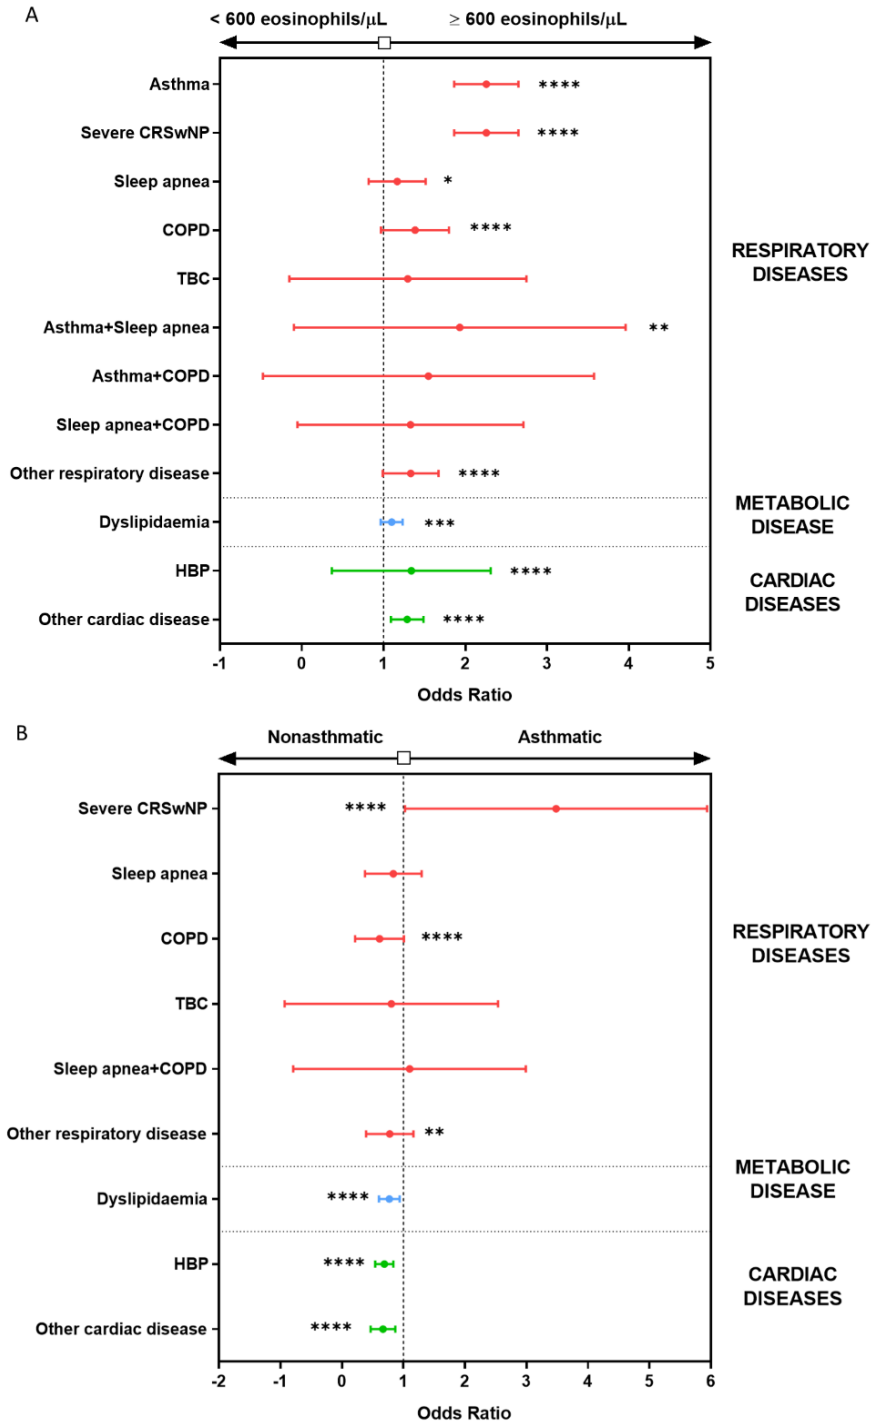

**Figure S2.** Asthma disease presents a significant association with CRSwNP. Odds ratio of respiratory, metabolic, and cardiovascular diseases according to (A), BEC or (B), asthma. \* =  $P < 0.05$ ; \*\* =  $P < 0.005$ ; \*\*\* =  $P < 0.001$ ; \*\*\*\* =  $P < 0.0001$ . OR: Odds Ratio; CRSwNP: Chronic Rhinosinusitis with Nasal Polyps; COPD: Chronic Obstructive Pulmonary Disease; TBC: Tuberculosis; HBP: High Blood Pressure; BEC: Blood Eosinophil Count.

**Supplementary Table 1:** Univariate and multivariate logistic regression model with BEC>600 eosinophils/μL as the main variable.

| Variable                     | UNIVARIATE              |                  | MULTIVARIATE            |                  |
|------------------------------|-------------------------|------------------|-------------------------|------------------|
|                              | OR (95% CI)             | P                | OR (95% CI)             | P                |
| Age                          | 0.99 (0.99-0.99)        | 0.002            | 0.99 (0.99-0.99)        | <0.001           |
| Female Sex                   | 0.87 (0.84-0.90)        | <0.001           | 0.85 (0.82-0.89)        | <0.001           |
| Hospitalizations             | <b>1.49 (1.43-1.54)</b> | <b>&lt;0.001</b> | <b>1.47 (1.41-1.53)</b> | <b>&lt;0.001</b> |
| Emergency department visits  | 1.16 (1.06-1.28)        | 0.001            | 1.07 (0.97-1.17)        | 0.186            |
| Severe CRSwNP                | <b>2.11 (1.66-2.67)</b> | <b>&lt;0.001</b> | <b>1.78 (1.40-2.27)</b> | <b>&lt;0.001</b> |
| Dyslipidaemia                | 1.12 (1.07-1.18)        | <0.001           | 1.08 (1.02-1.14)        | 0.008            |
| HBP                          | 1.16 (1.11-1.21)        | <0.001           | 1.15 (1.09-1.22)        | <0.001           |
| Other cardiovascular disease | <b>1.33 (1.25-1.41)</b> | <b>&lt;0.001</b> | 1.16 (1.08-1.25)        | <0.001           |
| Asthma                       | <b>2.10 (1.96-2.24)</b> | <b>&lt;0.001</b> | <b>2.14 (1.99-2.29)</b> | <b>&lt;0.001</b> |
| Sleep apnea                  | 1.16 (1.03-1.311)       | 0.015            | 1.09 (0.96-1.24)        | 0.164            |
| COPD                         | <b>1.38 (1.22-1.56)</b> | <b>&lt;0.001</b> | <b>1.35 (1.19-1.54)</b> | <b>&lt;0.001</b> |
| TBC                          | 1.21 (0.75-1.90)        | 0.418            | 1.29 (0.80-2.03)        | 0.297            |
| Asthma + asleep apnea        | <b>1.81 (1.16-2.79)</b> | <b>0.010</b>     | 0.81 (0.51-1.26)        | 0.354            |
| Asthma + COPD                | <b>1.40 (0.79-2.40)</b> | <b>0.242</b>     | 0.69 (0.39-1.20)        | 0.189            |
| Sleep apnea + COPD           | 1.25 (0.80-1.91)        | 0.312            | 1.11 (0.71-1.70)        | 0.642            |
| Other pulmonary disease      | <b>1.33 (1.20-1.47)</b> | <b>&lt;0.001</b> | <b>1.30 (1.17-1.5)</b>  | <b>&lt;0.001</b> |

Abbreviations: OR, Odds Ratio; 95% CI, 95% Confidence Interval; HBP, High Blood Pressure; CRSwNP, Chronic Rhinosinusitis with Nasal Polyps; COPD, Chronic Obstructive Pulmonary Disease; TBC, Tuberculosis; ns: not statistically significant.

Note: Values in bold are significant and with an OR lesser than 0.7 and/or higher than 1.3.

**Supplementary Table 2:** Univariate and multivariate logistic regression model with asthma as the main variable.

| Variable                     | UNIVARIATE              |                  | MULTIVARIATE            |                  |
|------------------------------|-------------------------|------------------|-------------------------|------------------|
|                              | OR (95% CI)             | <i>P</i>         | OR (95% CI)             | <i>P</i>         |
| Age                          | 0.99 (0.99-0.99)        | <0.001           | 0.99 (0.98-0.99)        | <0.001           |
| Female sex                   | <b>1.60 (1.49-1.71)</b> | <b>&lt;0.001</b> | <b>1.58 (1.47-1.69)</b> | <b>&lt;0.001</b> |
| Hospitalizations             | 1.05 (0.99-1.13)        | 0.131            | 1.09 (1.01-1.17)        | 0.021            |
| Emergency department visits  | <b>0.60 (0.53-0.68)</b> | <b>&lt;0.001</b> | <b>0.55 (0.48-0.63)</b> | <b>&lt;0.001</b> |
| BEC                          | 1.29 (1.23-1.36)        | <0.001           | 1.30 (1.23-1.37)        | <0.001           |
| Severe CRSwNP                | <b>3.40 (2.52-4.51)</b> | <b>&lt;0.001</b> | <b>3.35 (2.47-4.46)</b> | <b>&lt;0.001</b> |
| Dyslipidaemia                | 0.83 (0.76-0.91)        | <0.001           | 1.04 (0.94-1.16)        | 0.405            |
| HBP                          | 0.74 (0.68-0.81)        | <0.001           | 0.90 (0.81-0.99)        | 0.048            |
| Other cardiovascular disease | 0.76 (0.68-0.86)        | <0.001           | 0.96 (0.84-1.09)        | 0.524            |

Abbreviations: OR, Odds Ratio; 95% CI, 95% Confidence Interval; HBP, High Blood Pressure; CRSwNP, Chronic Rhinosinusitis with Nasal Polyps; COPD, Chronic Obstructive Pulmonary Disease; TBC, Tuberculosis; ns: not statistically significant.

Note: Values in bold are significant and with an OR lesser than 0.7 and/or higher than 1.3.
